# Supplementary material
Source: PubMed Central journal article supplement (PMC6752709)

## Supplemental Figure Legends

**Supplemental Figure 1.** AAVrh.10hC1EI. **A.** Diagram of the AAVrh.10hC1EI construct, including the AAV2 inverted terminal repeats (ITR), encapsidation signal ( $\Psi$ ), CAG promoter, optimized hC1EI cDNA, and rabbit  $\beta$ - globin polyadenylation (polyA) signal. **B.** *In vitro* characterization of AAVrh.10hC1EI vector. The AAVrh.10hC1EI vector was produced by co-transfection into human embryonic kidney 293T cells of the pAAV plasmid together with a plasmid carrying the AAV Rep proteins derived from AAV2 (needed for vector replication), the AAVrh.10 viral structural (Cap) proteins VP1, 2 and 3, which define the serotype of the produced AAV vector and the adenovirus helper functions of E2, E4 and VA RNA. Shown is an SDS-PAGE gel of the purified virus demonstrating the VP1, 2 and 3 capsid proteins. **C.** To assess the expression cassette, *in vitro* expression of hC1EI was evaluated in HEK293T cells transfected with either pAAV.CAG.hC1EI or control (pAAV-GFP) plasmids; 48 hr later, Western analysis was carried out on supernatants with anti-hC1EI antibody. **Lane 1** - purified human C1EI protein (1  $\mu$ g); **lane 2** - supernatant, pAAVhC1EI transfection; and **lane 3** - supernatant, pAAV-GFP transfection. Arrow, expected size for glycosylated hC1EI (105 kDa).

**A. AAVrh.10C1EI vector**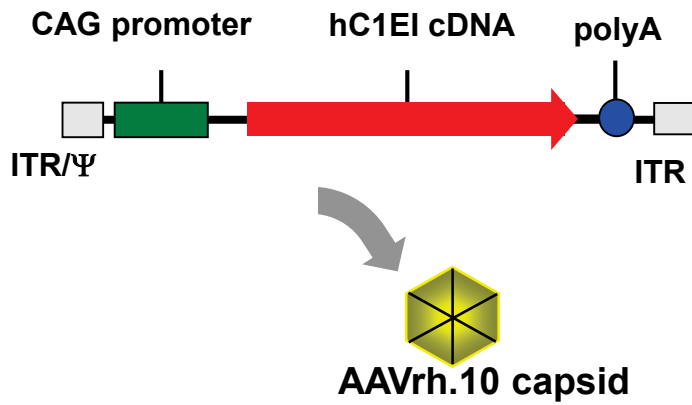**B. SDS-PAGE**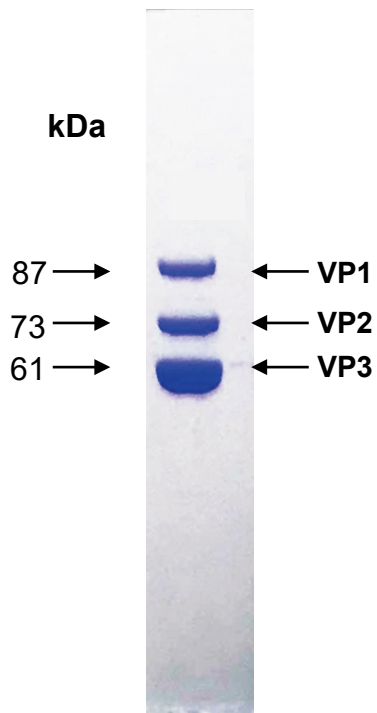**C. *In vitro* expression**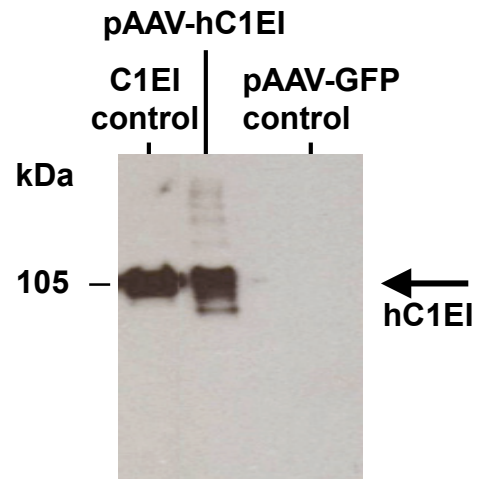

Supplement: NIHMS1047509-supplement-Figure_and_Legend.pdf [file NIHMS1047509-supplement-Figure_and_Legend.pdf]
